# Estimation of Immune Cell Densities in Immune Cell Conglomerates: An Approach for High-Throughput Quantification

Niels Halama<sup>1,2</sup>, Inka Zoernig<sup>1</sup>, Anna Spille<sup>1</sup>, Kathi Westphal<sup>2</sup>, Peter Schirmacher<sup>3</sup>, Dirk Jaeger<sup>1</sup>, Niels Grabe<sup>2,3\*</sup>

**1** Medical Oncology, National Center for Tumor Diseases, University of Heidelberg, Heidelberg, Germany, **2** Hamamatsu Tissue Imaging and Analysis (TIGA) Center, Institute for Medical Biometry and Informatics, University of Heidelberg, Heidelberg, Germany, **3** Institute of Pathology, University of Heidelberg, Heidelberg, Germany

## Abstract

**Background:** Determining the correct number of positive immune cells in immunohistological sections of colorectal cancer and other tumor entities is emerging as an important clinical predictor and therapy selector for an individual patient. This task is usually obstructed by cell conglomerates of various sizes. We here show that at least in colorectal cancer the inclusion of immune cell conglomerates is indispensable for estimating reliable patient cell counts. Integrating virtual microscopy and image processing principally allows the high-throughput evaluation of complete tissue slides.

**Methodology/Principal findings:** For such large-scale systems we demonstrate a robust quantitative image processing algorithm for the reproducible quantification of cell conglomerates on CD3 positive T cells in colorectal cancer. While isolated cells (28 to 80  $\mu\text{m}^2$ ) are counted directly, the number of cells contained in a conglomerate is estimated by dividing the area of the conglomerate in thin tissues sections ( $\leq 6 \mu\text{m}$ ) by the median area covered by an isolated T cell which we determined as 58  $\mu\text{m}^2$ . We applied our algorithm to large numbers of CD3 positive T cell conglomerates and compared the results to cell counts obtained manually by two independent observers. While especially for high cell counts, the manual counting showed a deviation of up to 400 cells/ $\text{mm}^2$  (41% variation), algorithm-determined T cell numbers generally lay in between the manually observed cell numbers but with perfect reproducibility.

**Conclusion:** In summary, we recommend our approach as an objective and robust strategy for quantifying immune cell densities in immunohistological sections which can be directly implemented into automated full slide image processing systems.

**Citation:** Halama N, Zoernig I, Spille A, Westphal K, Schirmacher P, et al. (2009) Estimation of Immune Cell Densities in Immune Cell Conglomerates: An Approach for High-Throughput Quantification. PLoS ONE 4(11): e7847. doi:10.1371/journal.pone.0007847

**Editor:** Syed A. Aziz, Health Canada, Canada

**Received:** September 16, 2009; **Accepted:** October 23, 2009; **Published:** November 16, 2009

**Copyright:** © 2009 Halama et al. This is an open-access article distributed under the terms of the Creative Commons Attribution License, which permits unrestricted use, distribution, and reproduction in any medium, provided the original author and source are credited.

**Funding:** NH and IZ are supported by the medical faculty of the University of Heidelberg. DJ is supported by the Cancer Research Institute (NY). NG and KW are supported by the German Ministry for Science and Education (BMBF). The funders had no role in study design, data collection and analysis, decision to publish, or preparation of the manuscript.

**Competing Interests:** The authors have declared that no competing interests exist.

\* E-mail: Niels.Grabe@bioquant.uni-heidelberg.de

These authors contributed equally to this work.

## Introduction

In situ immunohistochemical staining of tumor-infiltrating immune cells against the immune cell surface molecules CD3, CD8, CD45RO and Granzyme B in large cohorts of human colorectal cancers [1–3] supports the hypothesis that the adaptive immune response influences the behavior of human tumors. It is important to note that the observed immune cell densities were better predictors of prognosis than the classical TNM classification [4–6], initiating a debate on the feasibility of individualized prognosis prediction based on immune cell densities. Early data also indicates a relation of immune cell density to chemotherapy efficacy [7], making detailed quantification of immunologic tumor infiltrating cells even more attractive for clinical decisions. Tumor-infiltrating immune cells therefore represent a valuable prognostic tool in the treatment of colorectal cancer, a high density of

immune cells being associated with good outcome independently of other established prognostic markers. In other tumor entities the prognostic value of these immune cells could also be demonstrated [8–12]. Immunohistochemical quantitative analysis of immune cell surface markers can therefore be regarded as an important prognostic and predictive tool, requiring a high standard of precision and reproducibility for individualized patient care.

Virtual microscopy (VM) represents an important technological advancement in histology as it allows for the first time the automated high throughput microscopy of complete microscopic slides. By its ability to automatically microscope a full glass slides, VM can deliver unprecedented spatial expression data, visualizing spatial heterogeneity of histological parameters on the level of the individual patient. The capabilities of the new VM technology facilitate the solution of some long standing problems in diagnostic histology.

Here we study the contribution of VM to the quantitative analysis of immune cell densities which is regularly obstructed by the presence of immune cell conglomerates. Traditionally, manual cell counts by observers are regarded as the gold standard in histopathological quantification. But for independent observers it is frequently rather difficult to reproduce quantities of cell densities roughly estimated by others [13,14]. This is especially the case with the difficult estimation of the number of cells contained in complex cell conglomerates (see figure 1), leading to incomplete evaluations of slides [15]. Instead, combining full slide scanning by VM with automatic whole slide image processing provides the basis for developing an algorithmic solution for estimating these cell conglomerates. On the one hand such an algorithm allows the automatic evaluation of large batches of immunohistological slides in an automatic high-throughput manner. On the other hand, it also ensures the comprehensive, objective, reproducible and quantitative evaluation of the respective slides. In this article we present such an algorithmic approach which yields robust and reliable estimations of cell densities in even in large cell conglomerates.

## Materials and Methods

### Tissue Selection

The presented analysis comprises 20 samples from colorectal cancer primary tumors, 12 liver metastases, 10 normal colon mucosa and 10 liver samples. Approval from the medical ethics committee at the University of Heidelberg was obtained and written informed consent was obtained from all patients.

### Immunohistochemical Staining

Tissue specimens were immunohistochemically analyzed for their overall infiltration with T cells (CD3-positive cells). Tissue sections (2  $\mu\text{m}$ ) were prepared from formalin-fixed, paraffin-

embedded material. After deparaffinization and rehydration, the slides were boiled in 10 mM citrate buffer (pH 6) for 15 minutes to retrieve the antigens. The endogenous peroxidase activity was blocked by incubation with 0.6%  $\text{H}_2\text{O}_2$  in methanol for 20 minutes. The sections were blocked with 10% normal horse serum (Vectastain® Elite ABC kit, Vector, USA). Mouse monoclonal antibodies recognizing human CD3 (1:50 dilution, clone PS1, Acris, Germany). This antibody was applied as primary antibody at room temperature for 2 hours. The slides were incubated with a biotinylated secondary antibody (1:50 dilution, horse-anti-mouse IgG, Vectastain® Elite ABC kit, Vector, USA) for 30 minutes at room temperature and AB reagent was applied according to the manufacturer's instructions (Vectastain® Elite ABC kit, Vector, USA). The antigen detection was performed by a color reaction with 3,3'-di-amino-benzidine (DAB+ chromogen, DakoCytomation, USA). The sections were counterstained with hematoxylin (AppliChem, Germany) and mounted with Aquatex (Merck, Germany).

### Evaluation of Immune Cell Densities

From twenty sections across primary colorectal cancer, ten sections of normal colon mucosa, ten sections of normal liver and twelve sections of liver metastases a total of 100 samples of single CD3 positive T cells were measured manually for their area (using the Hamamatsu NDP viewer software).

All slides were scanned using the NDP Nanozoomer HT from Hamamatsu Photonics. The NDP Nanozoomer produces virtual images of full tissue scans which have been analyzed visually as well as by automatic image processing algorithms. The full tissue sections allow large scale histological evaluations with high precision across the complete section. Thus, ambiguities due to varying cell densities across the tissue can be avoided. We used a resolution of 0.46  $\mu\text{m}/\text{pixel}$  (40 $\times$ ).

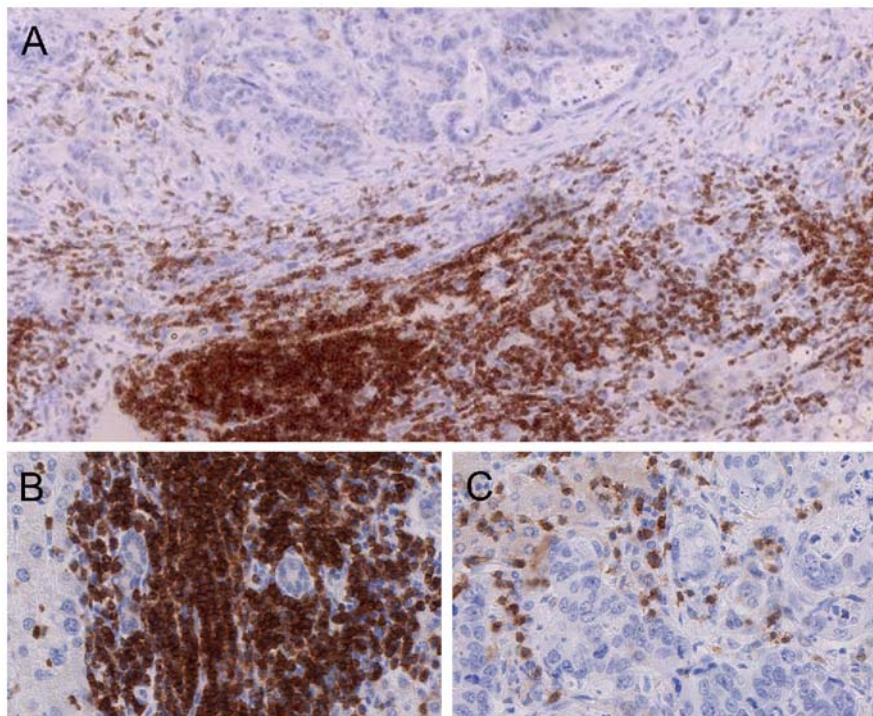

**Figure 1. Conglomerates and single cells.** Liver metastasis of colorectal cancer with strong T cell infiltrate (CD3 staining: dark red with hematoxylin counterstaining, A: overview, digital magnification 10 $\times$ , B: conglomerate (magnification 40 $\times$ ), C: single cells, (magnification 40 $\times$ ). doi:10.1371/journal.pone.0007847.g001

**Table 1.** Cell counts of T cells (CD3+) in thirty different fields of 1 mm<sup>2</sup> size.

| Field #         | 1   | 2    | 3    | 4    | 5    | 6    | 7    | 8    | 9    | 10   |
|-----------------|-----|------|------|------|------|------|------|------|------|------|
| Manual1         | 157 | 184  | 223  | 336  | 384  | 387  | 375  | 648  | 672  | 493  |
| Manual2         | 92  | 171  | 207  | 238  | 272  | 422  | 409  | 617  | 476  | 457  |
| Automated       | 80  | 172  | 208  | 252  | 288  | 366  | 406  | 486  | 504  | 524  |
| Abs. Diff. Man. | 65  | 13   | 16   | 98   | 112  | 35   | 34   | 31   | 196  | 36   |
| % Diff. Man.    | 41% | 7%   | 7%   | 29%  | 29%  | 9%   | 9%   | 5%   | 29%  | 7%   |
| Field #         | 11  | 12   | 13   | 14   | 15   | 16   | 17   | 18   | 19   | 20   |
| Manual1         | 546 | 600  | 692  | 751  | 700  | 729  | 854  | 872  | 924  | 1080 |
| Manual2         | 502 | 571  | 642  | 697  | 738  | 895  | 605  | 978  | 748  | 855  |
| Automated       | 530 | 574  | 654  | 710  | 764  | 789  | 798  | 847  | 852  | 860  |
| Abs. Diff. Man. | 44  | 29   | 50   | 54   | 38   | 166  | 249  | 106  | 176  | 225  |
| % Diff. Man.    | 8%  | 5%   | 7%   | 7%   | 5%   | 23%  | 29%  | 12%  | 19%  | 21%  |
| Field #         | 21  | 22   | 23   | 24   | 25   | 26   | 27   | 28   | 29   | 30   |
| Manual1         | 814 | 906  | 1214 | 991  | 1051 | 1172 | 1383 | 1472 | 1255 | 1981 |
| Manual2         | 858 | 1221 | 933  | 1381 | 1484 | 1078 | 1190 | 1106 | 1514 | 2089 |
| Automated       | 888 | 963  | 985  | 1073 | 1117 | 1121 | 1213 | 1313 | 1334 | 2161 |
| Abs. Diff. Man. | 44  | 315  | 281  | 390  | 433  | 94   | 193  | 366  | 259  | 108  |
| % Diff. Man.    | 5%  | 35%  | 23%  | 39%  | 41%  | 8%   | 14%  | 25%  | 21%  | 5%   |

Fields with maximum differences between manual cell counts are highlighted.

Abs. Diff. Man. = Absolute Difference between Manual1 and Manual2, % Diff. Man. = Percentage Difference between Manual1 and Manual2.

doi:10.1371/journal.pone.0007847.t001

Visual analysis of the slides was done using the Hamamatsu NDP viewer. At the invasive margin of colorectal cancer metastases or primary tumors, regions with visually high immune cell densities and conglomerates (each field with 1 mm<sup>2</sup> size) were selected randomly. Manual evaluation of stained immune cells was performed (in duplicates) by two independent observers. Variations in the identified cell quantities between observers were noted (see table 1). The results for each observer were expressed as the number of positive stained cells/mm<sup>2</sup>. Despite the fact that many different image processing systems could be used, we here implemented the procedure for assessing immune cell densities in cell conglomerates using the Visiomorph software (VisioMorph, Visiopharm, Denmark).

### Statistical Evaluation

Statistical analyses were performed with SPSS 16.0 software (SPSS, Chicago, IL). For the two-sample comparison of the distribution of continuous variables, exact Mann-Whitney U-tests were used. When comparing different tissues, the exact Kruskal-Wallis test was used. Results with two-tailed P values <.05 were judged to be statistically significant.

## Results

### Measurement of Cell Area Sizes in Sections with Isolated CD3 Positive T Cells

From twenty sections across primary colorectal cancer, ten sections of normal colon mucosa, ten sections of normal liver and twelve sections of liver metastases a total of 100 samples of single CD3 positive T cells were measured manually for their area (see methods). To avoid specific tissue biases, a quarter of the measurements was done in liver tissue, a quarter in metastatic tissue, one quarter in colorectal primary tumors and one quarter in normal mucosa. No significant differences in area sizes were seen between the four tissues (Kruskal-Wallis test,  $p = 0.581$ ). The resulting average area of an isolated T cell comprised 51  $\mu\text{m}^2$

**Table 2.** Cell area sizes of T cells (CD3+) measured in histological sections of different tissues with 2  $\mu\text{m}$  thickness.

| Liver | Liver metastases | Primary CRC | Mucosa |
|-------|------------------|-------------|--------|
| 57,2  | 52,6             | 39,9        | 53,2   |
| 62    | 47,8             | 50,7        | 61     |
| 62,6  | 64,7             | 37,8        | 49,3   |
| 29    | 47,7             | 46,4        | 66,1   |
| 33,4  | 53,6             | 32,4        | 51,6   |
| 48,8  | 53               | 40,8        | 63,6   |
| 43,4  | 59               | 62,6        | 50     |
| 54,8  | 41,3             | 80,1        | 49,6   |
| 58,8  | 49,7             | 53,8        | 59,8   |
| 41,1  | 62,2             | 47,6        | 69     |
| 46,8  | 43,4             | 55,3        | 70,5   |
| 42,6  | 46,6             | 75,9        | 47,2   |
| 60,2  | 46,3             | 58,2        | 46,6   |
| 56,2  | 63,2             | 48,1        | 37,8   |
| 42,7  | 37,1             | 67,3        | 64     |
| 64,2  | 59               | 57,6        | 60,1   |
| 61,3  | 48               | 45,5        | 36,7   |
| 50,5  | 33,9             | 59,3        | 39,3   |
| 40,7  | 37,3             | 51,1        | 38     |
| 51,2  | 46,8             | 46,8        | 56,2   |
| 63,7  | 46,9             | 50,5        | 52,9   |
| 46,9  | 44,8             | 61,3        | 42,4   |
| 39,8  | 46,7             | 76          | 27,5   |
| 42,6  | 62,4             | 55,6        | 38,3   |
| 31,5  | 50,1             | 50          | 59,3   |

doi:10.1371/journal.pone.0007847.t002

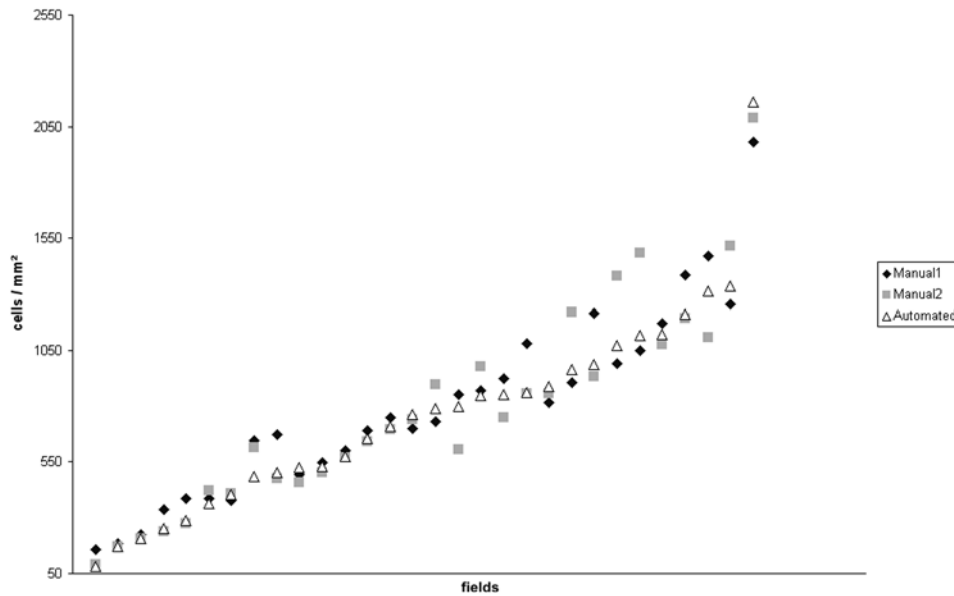

**Figure 2. Cell counts for 30 different fields with one or more conglomerates, each evaluated by two observers (“Manual1” and “Manual2”) and the here presented algorithm (“Automated”).** Note the up to 41% variation between the observers at high cell counts (1000-1,500). For quantitative data comparison see table 1. doi:10.1371/journal.pone.0007847.g002

(range being 28–80  $\mu\text{m}^2$ ; standard deviation 10.65  $\mu\text{m}^2$ ). The details on all measured cell areas in different tissues can be found in table 2.

### Comparison of the Manual Cell Counts for Two Observers on Cell Conglomerates

Figure 2 depicts the results for the individual observers and for the automated cell counting algorithm. Table 1 shows the according quantitative values measured for the two observers and the described automated algorithm as well as the observed differences. With increasing numbers of stained cells the divergence between the two observers with respect to the resulting cell densities was remarkable (partly exceeding 400 cells/ $\text{mm}^2$  difference). We calculated the variability as ranging from 5 to 41% depending on the area size of the conglomerate. As can be seen in figure 1, the estimation of cell densities in conglomerates by visual inspection is extremely difficult (see figure 1B) which explains the partly large differences in the manual evaluations. Especially in large conglomerates the estimation is not only time consuming but also extremely biased by the individual observer’s ability to estimate area sizes. The observers were allowed to repeat their calculations but this did not diminish the variability. A representative example is shown in figure 3, where the observer repeated the cell count for a single conglomerate six times. As therapy selection is increasingly done depending on exact thresholds, this clearly emphasizes the above mentioned fundamental need for a reliable method capable of objectively estimating cell densities in conglomerates. To estimate the importance of also incorporating conglomerates (besides single cell counts) into quantitative immunohistological cell counts compared to only considering the single cells we analyzed 10 fields of 10 different patients for single cells and for conglomerates (figure 4). The data show massive differences between the complete analysis and single cell counts only, rendering the inclusion of conglomerates in quantitative slide evaluations mandatory.

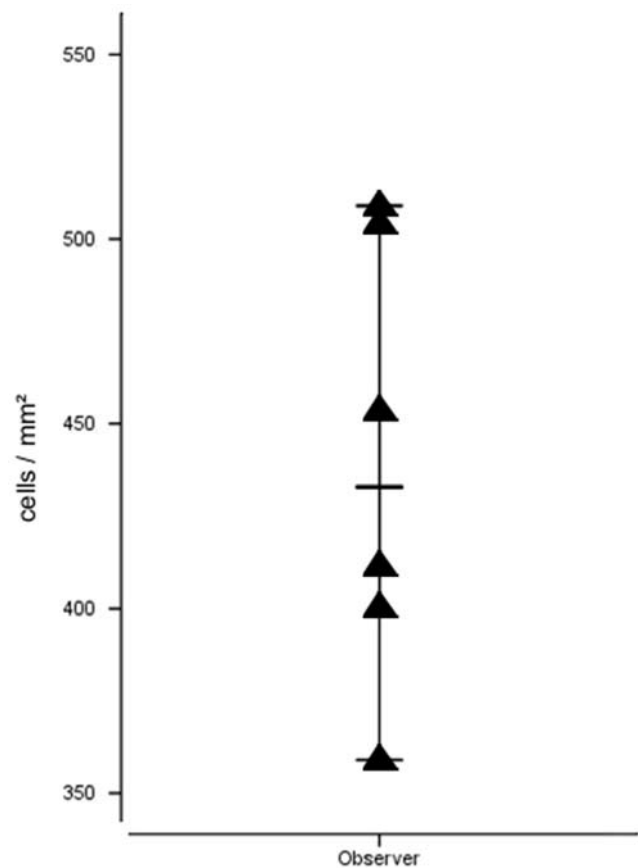

**Figure 3. Repeated quantification (six times) of a large conglomerate by one observer.** Triangles show single values for each repetition and thin vertical lines indicate range, thick horizontal line indicates average value. doi:10.1371/journal.pone.0007847.g003

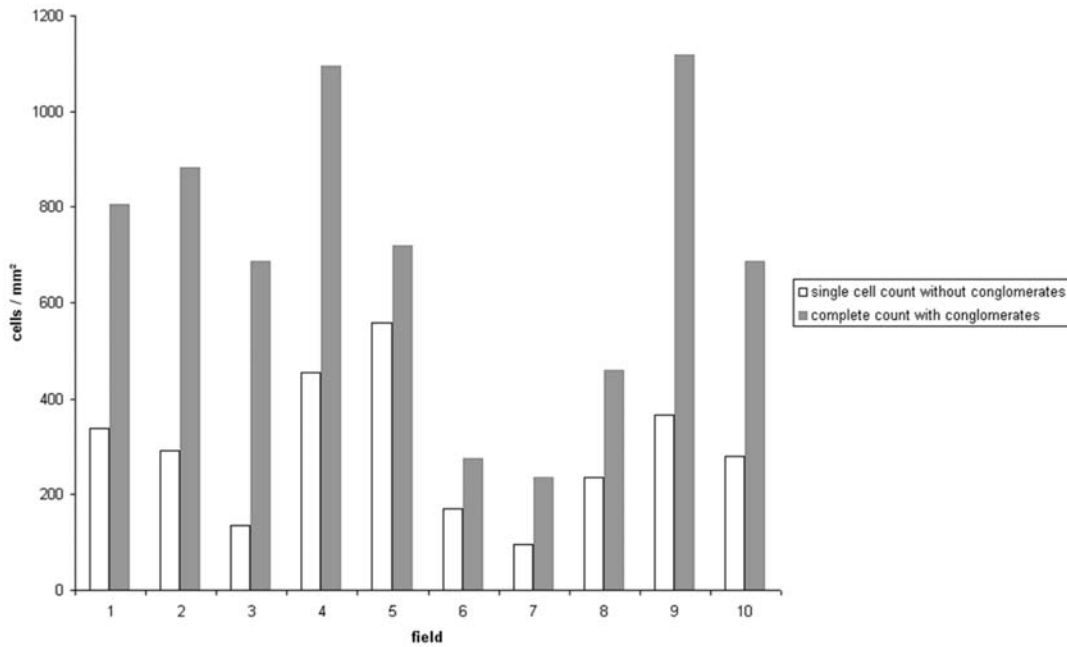

**Figure 4. Impact of cell counts from conglomerates on total cell counts in 10 individual 1 mm<sup>2</sup> fields from sections of 10 different patients.** Omitting conglomerates in the quantification would substantially distort the total cell counts. doi:10.1371/journal.pone.0007847.g004

### Details of the Automated Algorithm

The schematic approach is depicted in figure 5. The here described conglomerate and cell quantification procedure is embedded in a complex automated image processing pipeline including segmentation, color deconvolution and analyses of cellular morphology. The detailed implementation can vary between different computational image processing systems (Image J, VIS, Definiens, Alphelys etc.) and the respective implementation details are beyond the scope of this paper. Moreover, such algorithms are dependent on the specific tissue the respective target antigen is studied in. Specific explanations regarding image processing are therefore omitted here, because any implementation should somehow lead to the detection of single cells and aggregated cell clusters (“conglomerates”). Instead, here we present a general procedure for dealing with conglomerates in quantitative tissue analysis, independent of individual systems.

In dependence on the immunohistological detection system, every CD3 positive T cell is specified by a characteristic color and shape (“roundness”). These two parameters were used to identify CD3 positive cells in the tissue (“target objects”) either in isolated form or in form of conglomerates. Based on the target objects’ area size it was classified into “single T cells” or “T cell conglomerates”. If the area size exceeded triple the observed lower range of area ( $28 \mu\text{m}^2 \cdot 3 = 84 \mu\text{m}^2$ ) the target object was classified as “T cell conglomerates”, smaller objects were regarded as “single T cells” if within the normal range of T cell sizes. “Single T cell” objects were counted per field (1 mm<sup>2</sup> each). For a “T cell conglomerate” its area was divided by the average area of a single T cell ( $51 \mu\text{m}^2$ ) to obtain an estimate of the underlying cell density yielding an estimated T cell number. These T cell numbers were added to the number of “single T cell” objects to obtain a final estimation of cell densities for the given field.

### Comparison of the Results from the Automated Algorithm with the Manually Observed Numbers

Using 10× digital magnification, all manually counted fields (1 mm<sup>2</sup> each) were re-analyzed using an automated algorithm

based on the following approach. The manually obtained cell densities varied greatly across the two observers and accounted for a deviation of the estimated cell numbers of approximately 10%. The results are in line with other reports on inter-observer

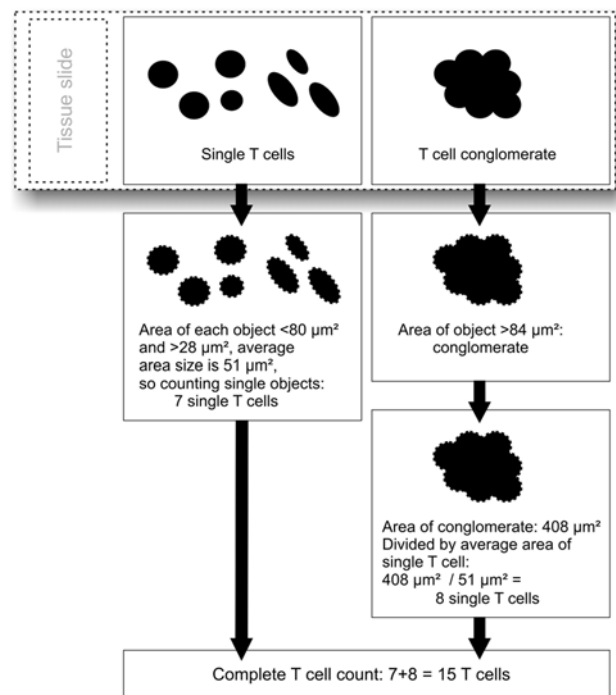

**Figure 5. Exemplary workflow for the described algorithm.** Stained immune cells are either counted individually (where possible) or the number of cells is estimated by the conglomerate surface. Both results are added. doi:10.1371/journal.pone.0007847.g005

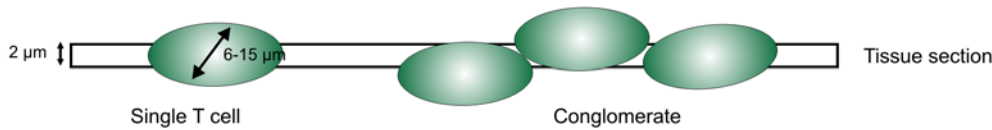

**Figure 6. Rationale behind the presented approach.** The figure shows the relation of the size of T cells to the height of the used tissue sections (2  $\mu\text{m}$ ). The sections are so thin, that there is only minimal overlap between the individual cells of a conglomerate. This allows for calculating the number of cells in a conglomerate by its total area.

doi:10.1371/journal.pone.0007847.g006

variability in histology stating even higher deviations between two observers [13]. This marked high inter-observer deviation is avoided with the automated system. Figure 2 shows the observed cell numbers for two independent observers in context of the performed corresponding automated analysis. Each field is 1  $\text{mm}^2$  and contains one or more conglomerates and scattered single CD3 positive T cells.

## Discussion

In diagnostic pathology the accurate determination of cell counts is of substantial importance as histological cut-offs are increasingly used as a basis for determining a patient's individual therapy strategy. Therefore, quantitative and objective methods are of primary concern in diagnostics and clinical decisions [16], especially in light of the accelerating automation of diagnostic routines. More and more image processing algorithms are used for an automatic pre-evaluation of tissue slides as a support for the diagnosing pathologist [17]. In immunological evaluations, cell counting is generally limited by the underlying quality and structure of the studied tissue sections. For example, overlapping cells are of concern when assessing tissue sections of greater thickness. The sections used here had a thickness of 2  $\mu\text{m}$ , thus minimizing the possible overlap between immune cells. T cells have a diameter of 6 to 15  $\mu\text{m}$ . Therefore, the here described procedure is untroubled also by densely packed cell conglomerates (see figure 6).

We here dealt with the problem of incorporating complex cell conglomerates into histological cell count cut-off studies. The presented data shows an enormous impact of conglomerates on calculated cell densities for a given field (see figure 4). Simply ignoring conglomerates as it is done in some recent studies [15] is

not acceptable because this leads to severe bias, which is especially devastating in clinically relevant settings where accurate evaluation with regard to cut-offs may be crucial to patient treatment or survival. In our view accurate counting also in conglomerates is indispensable for determining quantitative immunological patient responses. Image processing approaches including complex mathematical operations dissecting the conglomerates by finding local minimal and maximal staining intensities in an image ("watershed algorithms") could be considered, but generally are prone to severe errors due to unavoidable staining variability. Our approach here uses the reliable statistical and biological basis of immune cell size to calculate cell densities in conglomerates. It is applicable with widely used available software image analysis systems (ImageJ, VisioMorph, Definiens, etc.) and can implemented straight forward. The rather straight-forward mathematical image processing operations avoid complex computational operations and parameter settings. In this respect, our approach is very attractive especially for high-throughput quantifications of immunohistological evaluations. In summary we have shown that (1) quantification of immune cell conglomerates is indispensable when quantitatively evaluating immunohistological slides for immune cell markers and (2) an intuitive, high-throughput capable procedure for the objective and robust quantification of immune cell conglomerates.

## Author Contributions

Conceived and designed the experiments: NH IZ NG. Performed the experiments: NH AS. Analyzed the data: NH IZ KW PS DJ NG. Contributed reagents/materials/analysis tools: PS DJ NG. Wrote the paper: NH NG.

## References

- Menon AG, Janssen-van Rhijn CM, Morreau H, Putter H, Tollenaar RAEM, et al. (2004) Immune system and prognosis in colorectal cancer: a detailed immunohistochemical analysis. *Lab Invest* 84: 493–501.
- Prall F, Duhrkop T, Weirich V, Ostwald C, Lenz P, et al. (2004) Prognostic role of CD8+ tumor-infiltrating lymphocytes in stage III colorectal cancer with and without microsatellite instability. *Hum Pathol* 35: 808–816.
- Naito Y, Saito K, Shiiba K, Ohuchi A, Saigenji K, et al. (1998) CD8+ T cells infiltrated within cancer cell nests as a prognostic factor in human colorectal cancer. *Cancer Res* 58: 3491–3494.
- Galon J, Costes A, Sanchez-Cabo F, Kirilovsky A, Mlecnik B, et al. (2006) Type, density, and location of immune cells within human colorectal tumors predict clinical outcome. *Science* 313: 1960–1964.
- Pages F, Berger A, Camus M, Sanchez-Cabo F, Costes A, et al. (2005) Effector memory T cells, early metastasis, and survival in colorectal cancer. *N Engl J Med* 353: 2654–2666.
- Diederichsen ACP, Hjelmberg JvB, Christensen PB, Zeuthen J, Fenger C (2003) Prognostic value of the CD4+/CD8+ ratio of tumour infiltrating lymphocytes in colorectal cancer and HLA-DR expression on tumour cells. *Cancer Immunol Immunother* 52: 423–428.
- Halama N, Michel S, Kloor M, Zoernig I, Pommerenke T, et al. (2009) The localization and density of immune cells in primary tumors of human metastatic colorectal cancer shows an association with response to chemotherapy. *Cancer Immun* 9: 1.
- Salama P, Phillips M, Gricu F, Morris M, Zeps N, et al. (2008) Tumor-Infiltrating FOXP3+ T Regulatory Cells Show Strong Prognostic Significance in Colorectal Cancer. *J Clin Oncol* 27: 168–169.
- Ohtani H (2007) Focus on TILs: prognostic significance of tumor infiltrating lymphocytes in human colorectal cancer. *Cancer Immun* 7: 4.
- Zhang L, Conejo-Garcia JR, Katsaros D, Gimotty PA, Massobrio M, et al. (2003) Intratumoral T cells, recurrence, and survival in epithelial ovarian cancer. *N Engl J Med* 348: 203–213.
- Sato E, Olson SH, Ahn J, Bundy B, Nishikawa H, et al. (2005) Intraepithelial CD8+ tumor-infiltrating lymphocytes and a high CD8+/regulatory T cell ratio are associated with favorable prognosis in ovarian cancer. *Proc Natl Acad Sci U S A* 102: 18538–18543.
- Matkowski R, Gisterek I, Halon A, Lacko A, Szcwyczyk K, et al. (2009) The Prognostic Role of Tumor-infiltrating CD4 and CD8 T Lymphocytes in Breast Cancer. *Anticancer Res* 29: 2445–2451.
- Fuchs TJ, Wild PJ, Moch H, Buhmann JM (2008) Computational Pathology Analysis of Tissue Microarrays Predicts Survival of Renal Clear Cell Carcinoma Patients. 1–8.
- Choi YJ, Pinto MM, Hao L, Riba AK (2008) Interobserver variability and aberrant E-cadherin immunostaining of lobular neoplasia and infiltrating lobular carcinoma. *Mod Pathol* 21: 1224–1237.
- Laghi L, Bianchi P, Miranda E, Balladore E, Pacetti V, et al. (2009) CD3+ cells at the invasive margin of deeply invading (pT3-T4) colorectal cancer and risk of post-surgical metastasis: a longitudinal study. *Lancet Oncol* 10: 877–884.
- Gundersen HJ, Bendtsen TF, Korbo L, Marcussen N, Moller A, et al. (1988) Some new, simple and efficient stereological methods and their use in pathological research and diagnosis. *APMIS* 96: 379–394.
- Grabe N (2008) Virtual microscopy in systems pathology. *Pathologe* 29: 259–263.
